# Supplementary material for: MiRNA182 regulates percentage of myeloid and erythroid cells in chronic myeloid leukemia
Source: PubMed Central journal article supplement (PMC5386378; doi:10.1038/cddis.2016.471), 2017-01-12

## **Title**

**MiRNA182-5p regulates myeloid-erythroid ratio of chronic myeloid leukemia cells.**

Deepak Arya<sup>1, 2</sup>, Sasikala P.S.<sup>1</sup>, Cecil Ross<sup>3</sup>, Dasaradhi Palakodeti<sup>4</sup>, Shang Li<sup>5</sup>, Sudhir Krishna<sup>1</sup>, #

Supplementary File: Table- 1, Table- 2, Figure S1-12

## Supplementary table 1- Clinical details of CML patients

| Sample | Disease     | Response Status | BCR ABL  |
|--------|-------------|-----------------|----------|
| K562   | CML         | Blast           | Positive |
| CC1    | CML         | Yes             | 48.52    |
| CC2    | CML         | Yes             | Negative |
| CC3    | CML-fresh   | Fresh CML       |          |
| CC4    | CML fresh   | Fresh CML       |          |
| CC5    | CML-chronic | Yes             | 48.52    |
| CN1    | CML         | No              | 10.88    |
| CN2    | CML         | No              |          |
| CN3    | CML-fresh   | No              | NEG      |
| CB1    | CML-BLAST   | No              |          |
| CB2    | CML         | Yes             |          |
| CB3    | CML         |                 |          |
| NR1    | CML         | No              | 0.605    |
| NR2    | CML-NR      | No              | 57.43    |
| NR3    | CML         | No              | 25.62    |
| NR4    | CML         | No              | 0.00354  |
| NR5    | CML         | No              |          |
| NR6    | CML-NR      | Yes             |          |
| NR7    | CML         | No              |          |
| NR8    | CML-blast   | No              |          |

**Supplementary Table 2- Normalised fold change in the expression of miRNA182-5p.**

| MiRNA           | Control<br>(Normalised) | Imatinib<br>(Normalised) |
|-----------------|-------------------------|--------------------------|
| hsa-miR-941     | 1                       | 0.068028171              |
| hsa-miR-30c-5p  | 1                       | 0.720134867              |
| hsa-miR-19a-3p  | 1                       | 1.267480223              |
| hsa-miR-27b-3p  | 1                       | 0.084736281              |
| hsa-miR-1246    | 1                       | 0.499664526              |
| hsa-miR-642a-3p | 1                       | 0                        |
| hsa-miR-374b-5p | 1                       | 0.072930064              |
| hsa-miR-130b-5p | 1                       | 0.008215668              |
| hsa-let-7i-5p   | 1                       | 0.00079515               |
| hsa-miR-148b-3p | 1                       | 0.55020501               |
| hsa-miR-1278    | 1                       | 0                        |
| hsa-miR-374a-3p | 1                       | 0.072611937              |
| hsa-miR-425-5p  | 1                       | 0.125941609              |
| hsa-miR-24-3p   | 1                       | 0.086355795              |
| hsa-miR-33a-5p  | 1                       | 0.001261692              |
| hsa-miR-1291    | 1                       | 0.001186051              |
| hsa-miR-15b-5p  | 1                       | 0.075365058              |
| hsa-let-7d-5p   | 1                       | 0.00055199               |
| hsa-miR-151a-5p | 1                       | 0.039158973              |
| hsa-miR-22-3p   | 1                       | 0.030651689              |
| hsa-miR-18a-5p  | 1                       | 0.313138471              |
| hsa-miR-222-3p  | 1                       | 0                        |
| hsa-miR-144-3p  | 1                       | 0.008879411              |
| hsa-miR-320b    | 1                       | 0.003410919              |
| hsa-miR-151a-3p | 1                       | 0.103428327              |
| hsa-miR-330-3p  | 1                       | 0.008772168              |
| hsa-miR-125a-5p | 1                       | 0.049376705              |
| hsa-miR-182-5p  | 1                       | 2.998313088              |
| hsa-let-7b-5p   | 1                       | 0.000369092              |
| hsa-miR-23a-3p  | 1                       | 0.103891736              |
| hsa-miR-148a-3p | 1                       | 0.630124942              |
| hsa-miR-7-5p    | 1                       | 0.093070343              |
| hsa-miR-744-5p  | 1                       | 0.000901427              |
| hsa-miR-99b-5p  | 1                       | 0.101314617              |
| hsa-miR-92b-3p  | 1                       | 0.002587935              |
| hsa-miR-486-3p  | 1                       | 0.004077553              |
| hsa-miR-106b-5p | 1                       | 0.053452099              |
| hsa-miR-423-3p  | 1                       | 0.014604611              |
| hsa-miR-221-3p  | 1                       | 0                        |
| hsa-miR-16-5p   | 1                       | 0.180895997              |
| hsa-miR-186-5p  | 1                       | 0.089614021              |
| hsa-let-7c      | 1                       | 0.003299537              |
| hsa-miR-223-3p  | 1                       | 0.005871449              |

|                  |   |             |
|------------------|---|-------------|
| hsa-miR-93-5p    | 1 | 0.449292322 |
| hsa-miR-340-5p   | 1 | 0.005942312 |
| hsa-miR-144-5p   | 1 | 0.478218307 |
| hsa-miR-26a-5p   | 1 | 0.032706767 |
| hsa-miR-29a-3p   | 1 | 0.01236458  |
| hsa-miR-30e-5p   | 1 | 0.712356005 |
| hsa-miR-26b-5p   | 1 | 0.008254059 |
| hsa-miR-128      | 1 | 0.002599649 |
| hsa-miR-224-5p   | 1 | 0.002482631 |
| hsa-miR-142-5p   | 1 | 0.006297749 |
| hsa-miR-486-5p   | 1 | 0.063843255 |
| hsa-miR-130b-3p  | 1 | 0.023893347 |
| hsa-miR-20a-5p   | 1 | 0.664997979 |
| hsa-miR-10a-5p   | 1 | 0.120275996 |
| hsa-miR-451a     | 1 | 0.493771868 |
| hsa-miR-17-5p    | 1 | 0.226033823 |
| hsa-miR-107      | 1 | 0.000908133 |
| hsa-let-7g-5p    | 1 | 0           |
| hsa-miR-17-3p    | 1 | 0.004599515 |
| hsa-miR-192-5p   | 1 | 0.020082504 |
| hsa-miR-452-5p   | 1 | 0.010758428 |
| hsa-miR-30d-5p   | 1 | 0.086356953 |
| hsa-miR-19b-3p   | 1 | 0.132467871 |
| hsa-miR-25-5p    | 1 | 0.000126266 |
| hsa-miR-146b-5p  | 1 | 0.091046425 |
| hsa-miR-101-3p   | 1 | 0.066583124 |
| hsa-miR-191-5p   | 1 | 0.018408132 |
| hsa-miR-378a-3p  | 1 | 0.450659093 |
| hsa-miR-92a-1-5p | 1 | 0.00012145  |
| hsa-let-7e-5p    | 1 | 0.00075418  |
| hsa-miR-25-3p    | 1 | 0.004684743 |
| hsa-miR-140-3p   | 1 | 0.0102982   |
| hsa-miR-21-5p    | 1 | 0.023982188 |
| hsa-miR-423-5p   | 1 | 0.00626765  |
| hsa-miR-92a-3p   | 1 | 0.015070228 |
| hsa-miR-103a-3p  | 1 | 0.016940454 |
| hsa-let-7f-5p    | 1 | 0.001901265 |
| hsa-miR-185-5p   | 1 | 0.001187326 |
| hsa-let-7a-5p    | 1 | 0.000560282 |
| hsa-miR-320a     | 1 | 0.000452567 |

**Fig.S1 Effect of Imatinib on Bcr-Abl tyrosine kinase.**

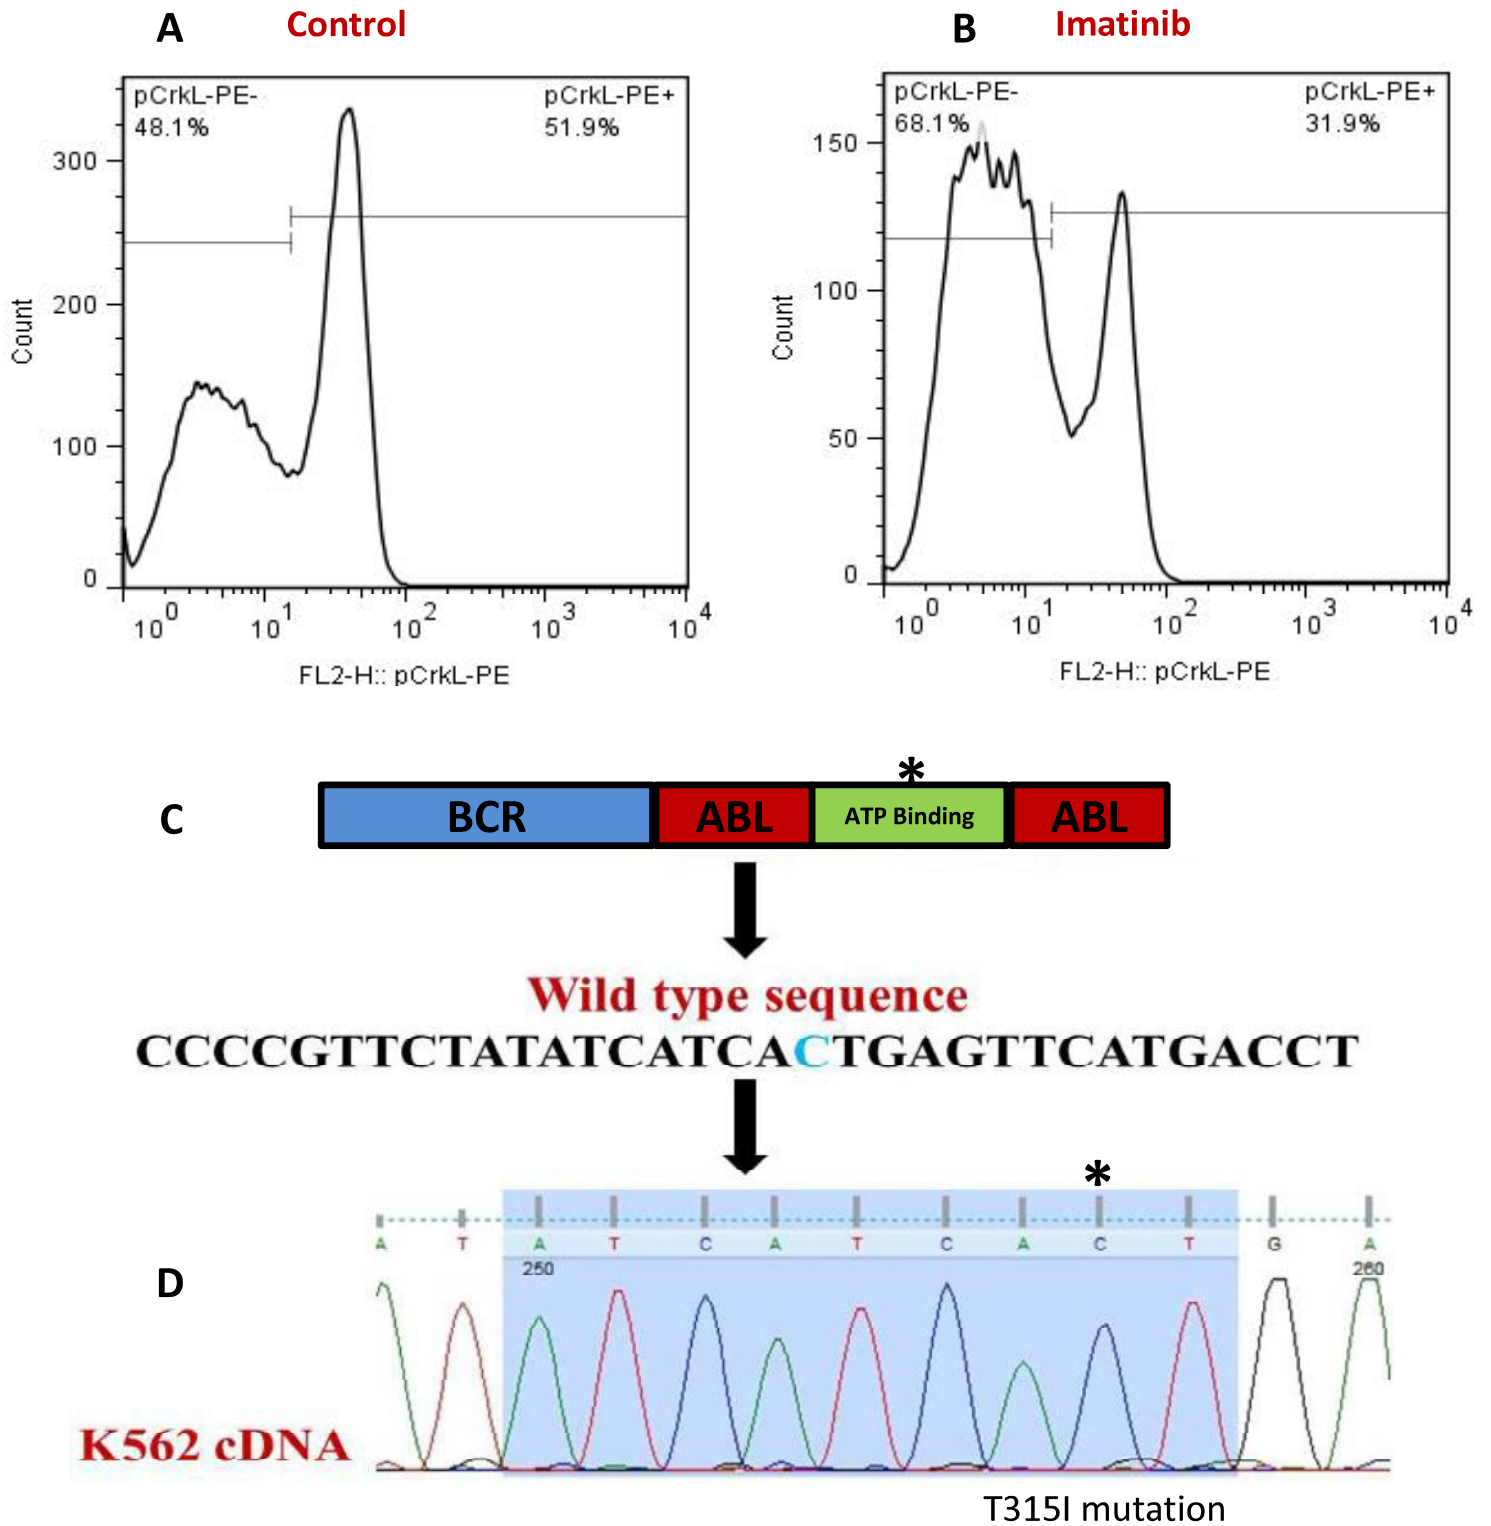

**Fig.S2 MiRNA182-5p negatively correlates with Notch signalling target genes in the context of TKI resistance.**

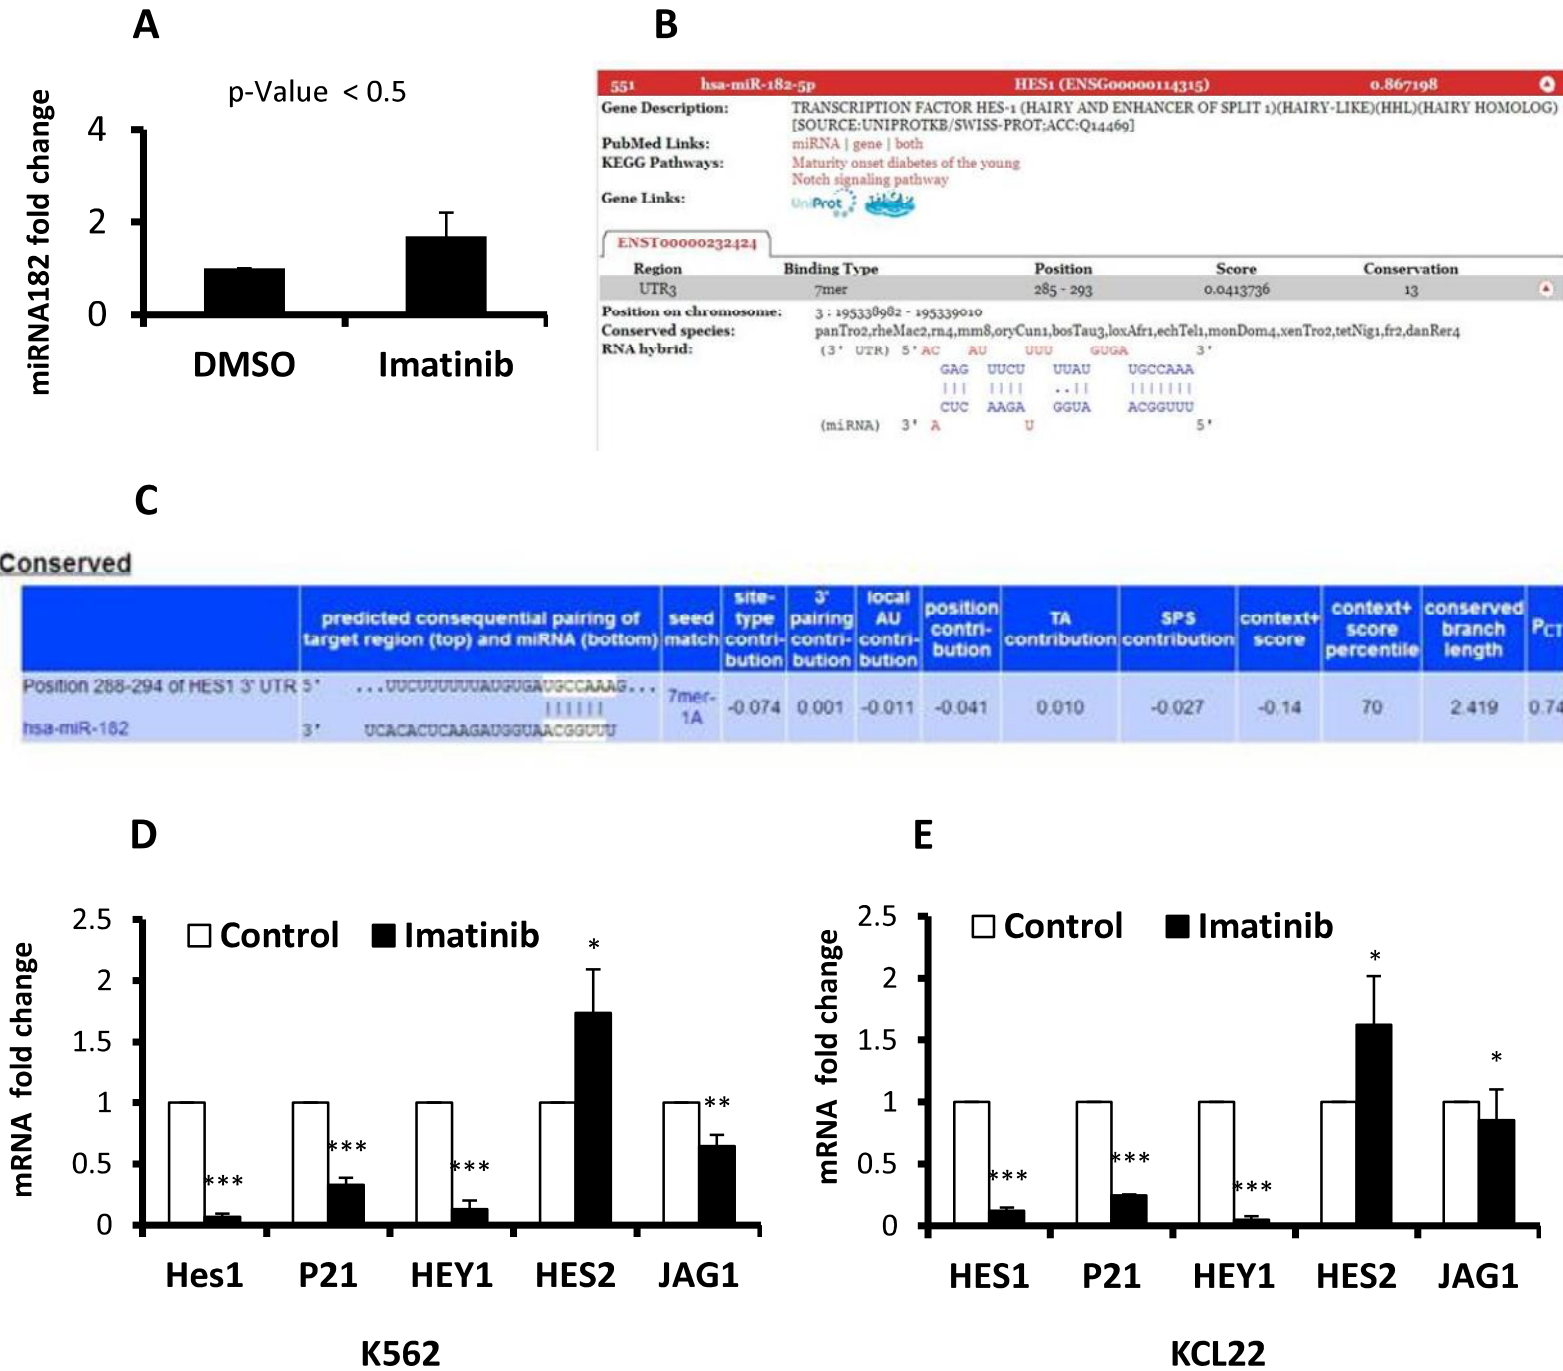

**Fig.S3 Analysis of miRNA182 signalling components.**

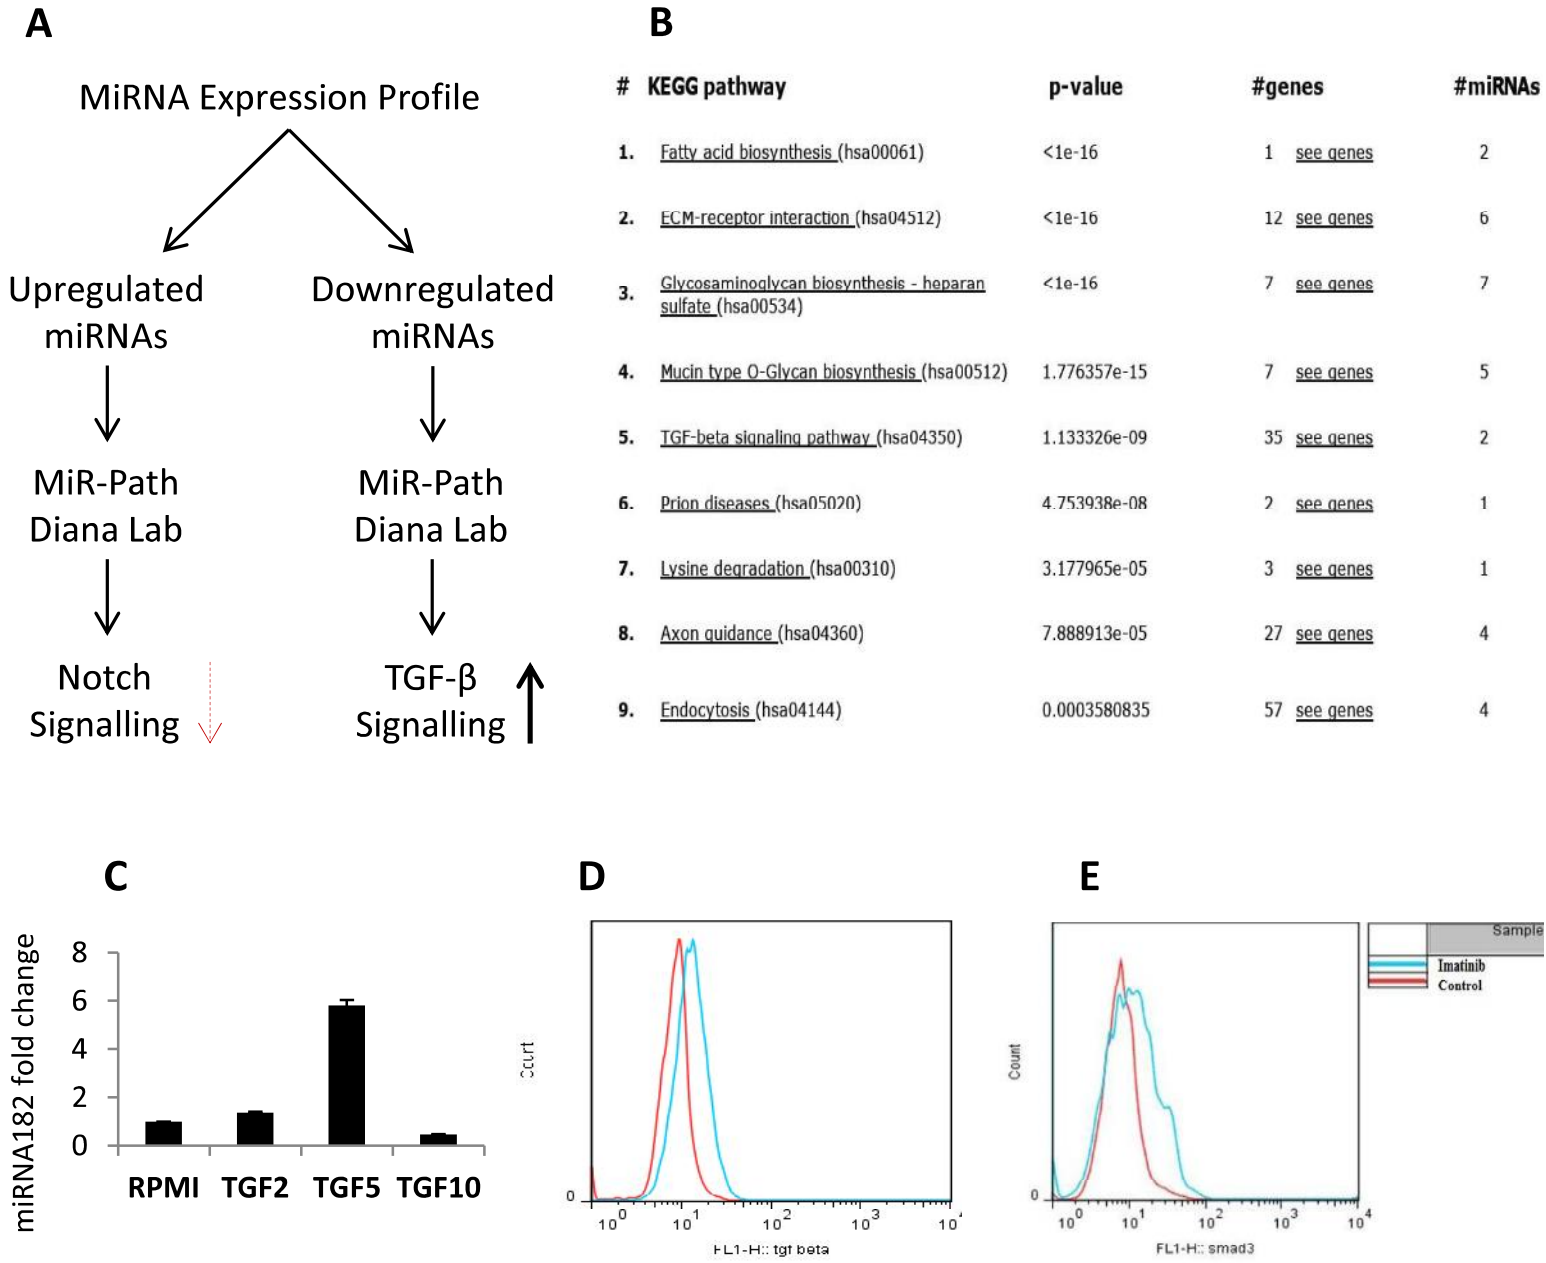

**Fig.S4 Effect of anti-miRNA182-5p on Hes1 expression in primary CML cells.**

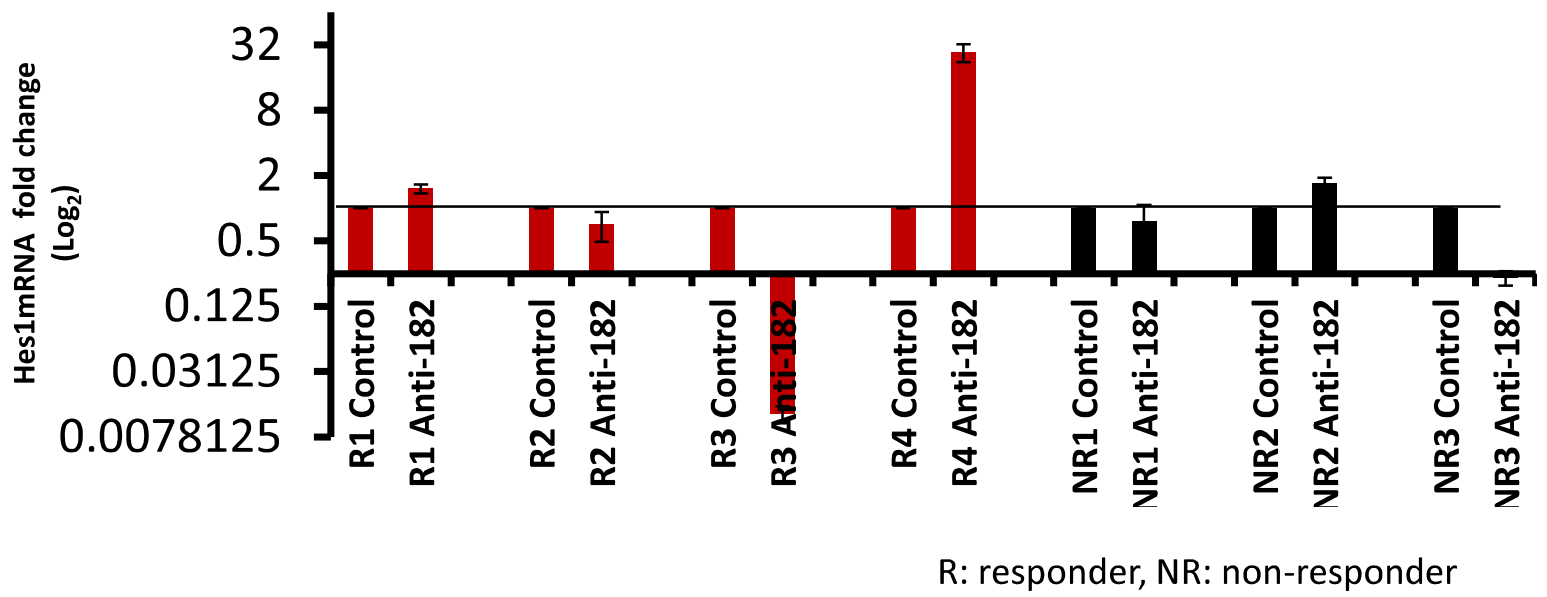



**Fig.S5 Experimental layout of *MIR182* knockout in K562 cells.**

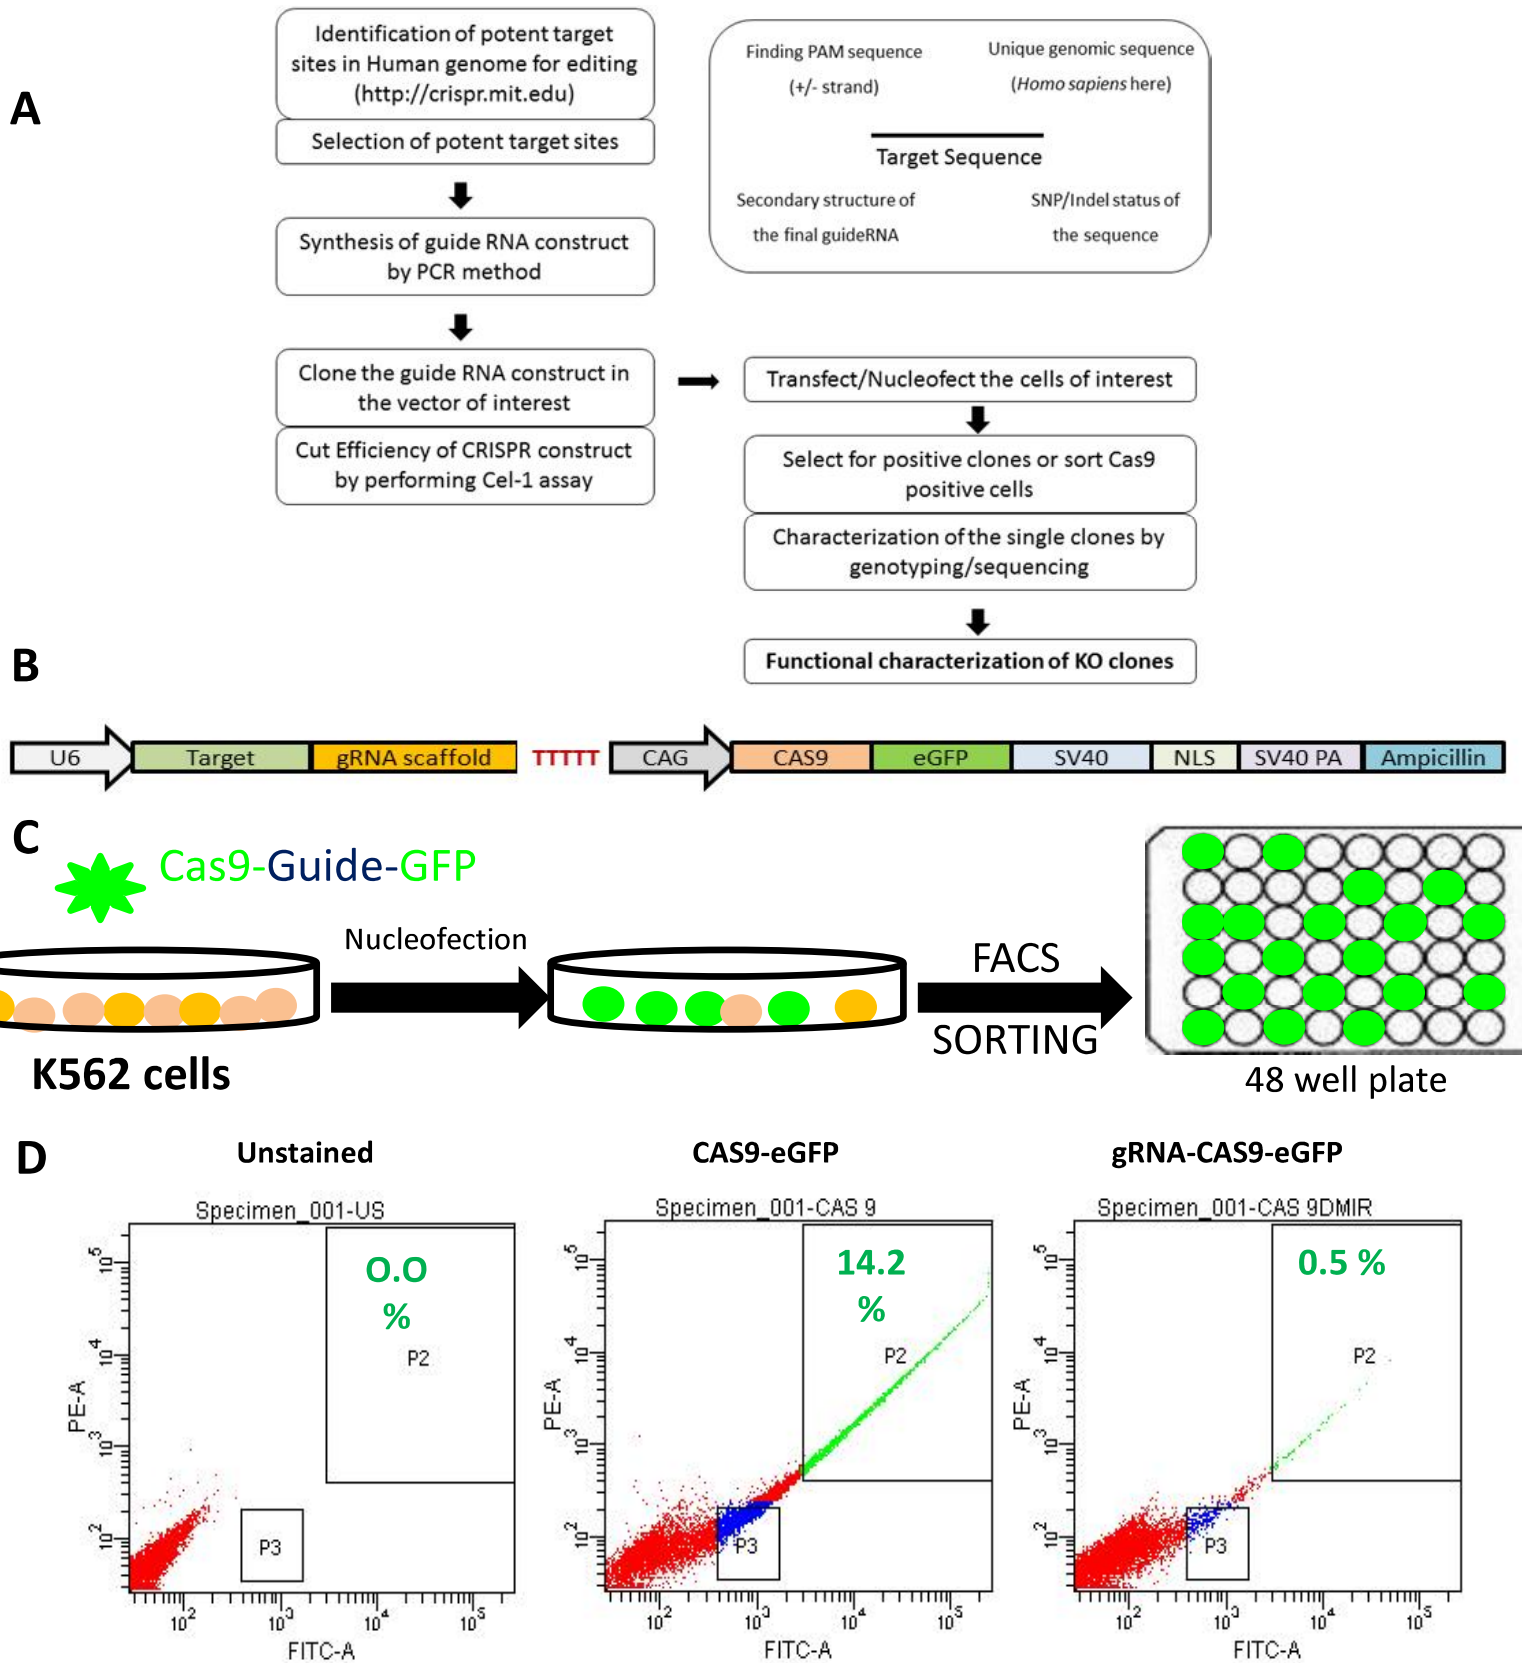

Fig.S6 CRISPR mediated *MIR182* knockout in HEK293 cells.

A

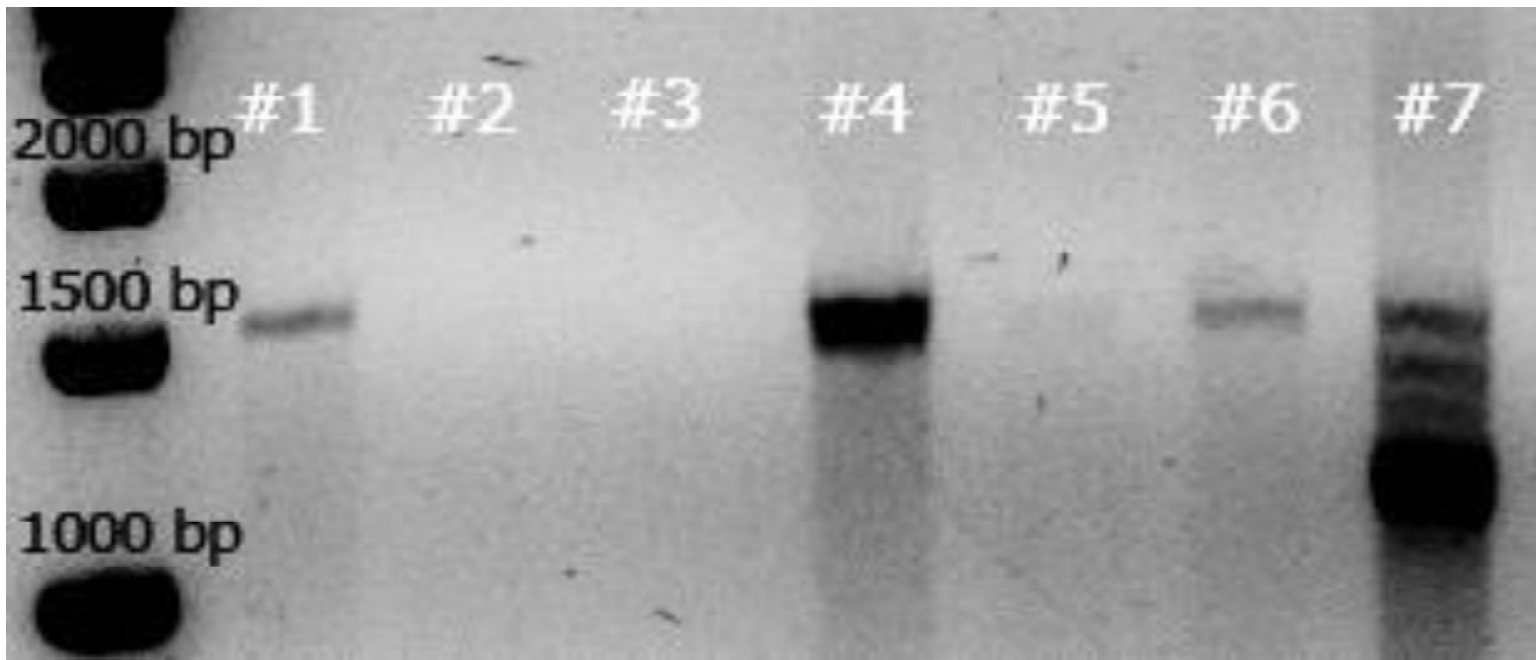

B

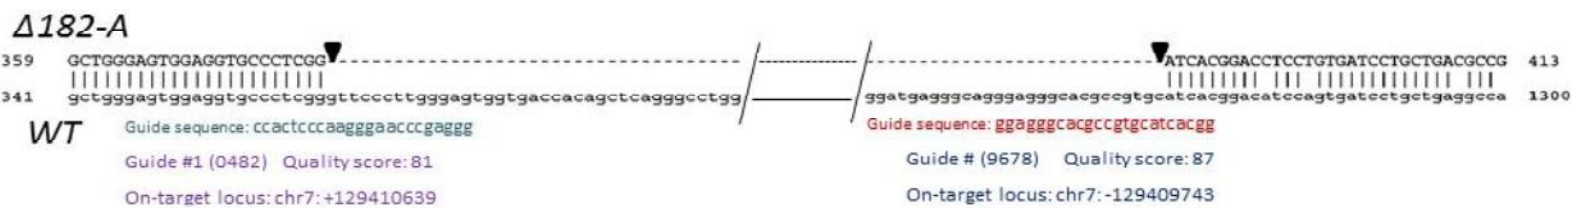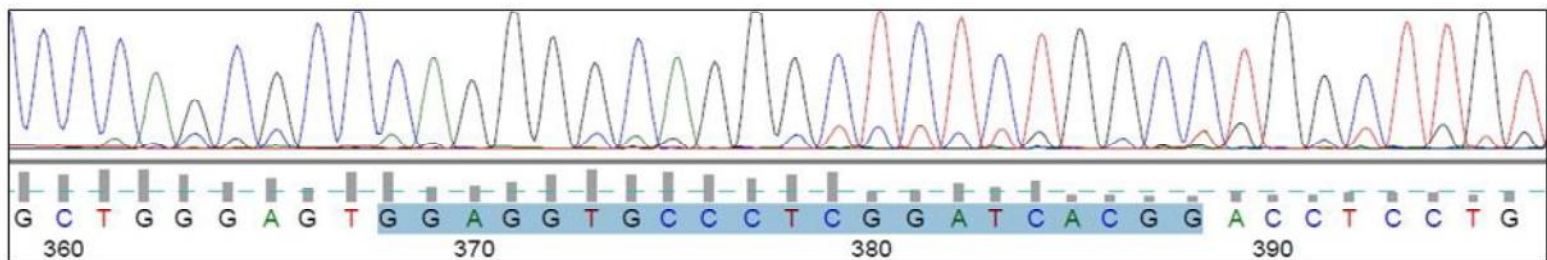

**Fig.S7 Effect of modulation in expression of miRNA182-5p on differentiation potential of K562 cells.**

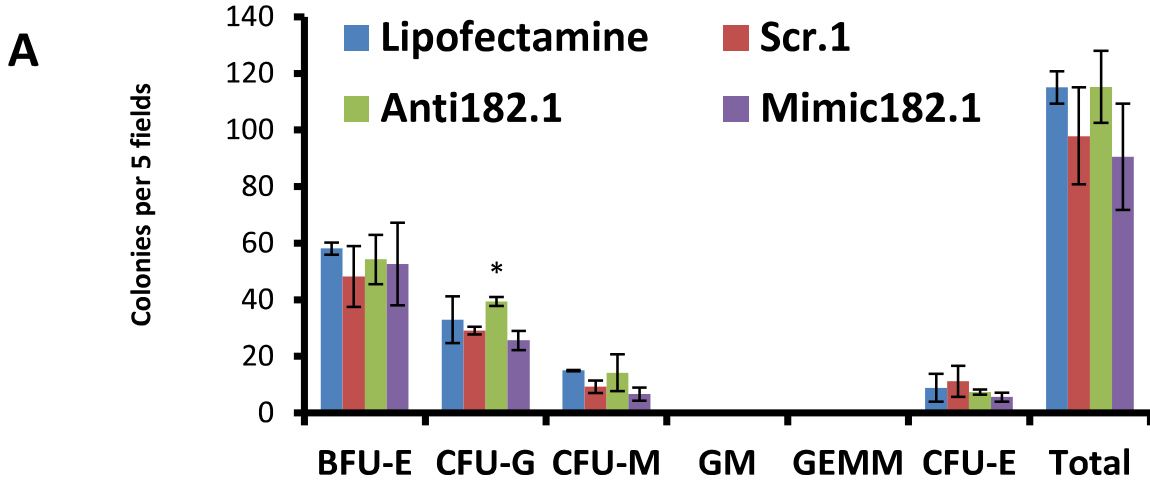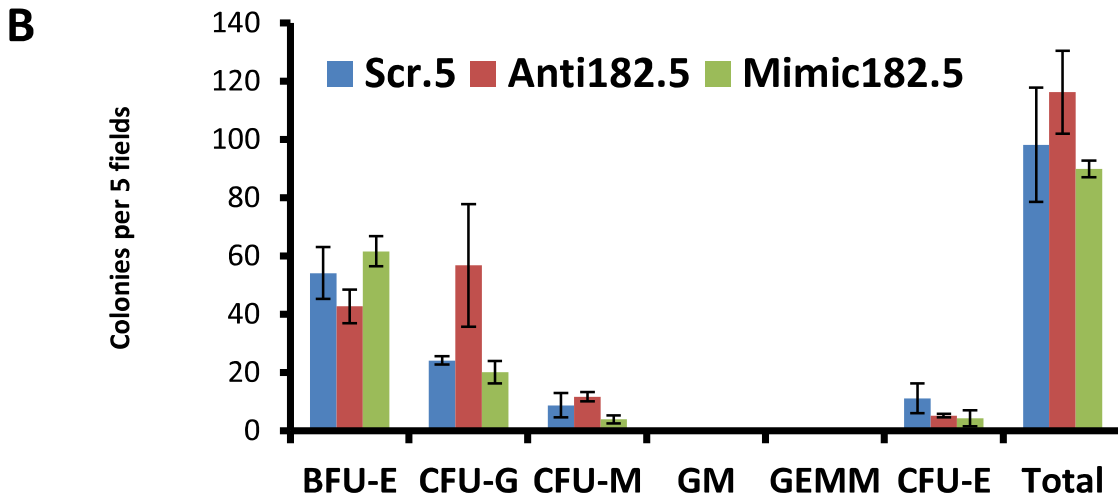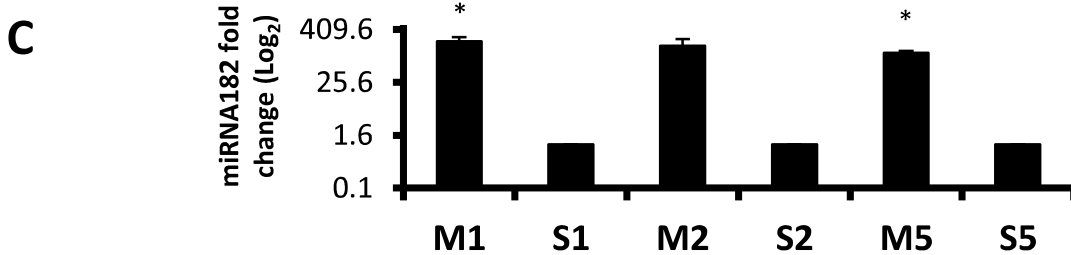

## Fig.S8 Off-target analysis of CRISPR guideRNAs targeting *MIR182* locus.

### Guide #4 (0425)

Quality score: **88**

Guide sequence: GAAGGACCTTGTCGCAGTTG**CGG**

On-target locus: chr7:-129410425

Number of off-target sites: 90 (25 are in genes)

| Sequence                 | score | mismatches      | UCSC gene | locus           |
|--------------------------|-------|-----------------|-----------|-----------------|
| TGAAGGCCCTTGTCGCAGTTGGGG | 0.8   | 4MMs [1:2:4:6]  | NM_020807 | chr16:+58030598 |
| TAAAAACCTTGTCGCAGTTGCAG  | 0.6   | 4MMs [1:4:5:13] |           | chr3:-106872028 |
| GTAGAACGTTGTTGCAGTTGTAG  | 0.6   | 4MMs [2:5:8:13] |           | chr8:+83102115  |
| GTAGGCTCTCGTCGCAGTTGAAG  | 0.5   | 4MMs [2:6:7:10] | NR_029427 | chrX:-48463337  |
| GCAGGACCTTGTTGCAATTGAAG  | 0.5   | 3MMs [2:13:17]  |           | chr5:-27227006  |

### Guide #1 (0482)

Quality score: **81**

Guide sequence: CCACTCCCAAGGGAACCCG**AGG**

On-target locus: chr7:+129410639

Number of off-target sites: 145 (15 are in genes)

| sequence                        | score | mismatches      | UCSC gene | locus           |
|---------------------------------|-------|-----------------|-----------|-----------------|
| TGACACCCAGGGGAACCCGATGG         | 1.3   | 4MMs [1:2:5:10] |           | chr10:+72837071 |
| <u>CTGCTCTGAAGGGAACCCGAGGG</u>  | 0.9   | 4MMs [2:3:7:8]  |           | chr7:-47843799  |
| TGACTCCAGAGGGAACCCGAAAG         | 0.9   | 4MMs [1:2:8:9]  |           | chr17:+3868097  |
| <u>CCAAACCTCAGGGGAACCCGAGGG</u> | 0.8   | 4MMs [4:5:8:9]  |           | chr10:+98478197 |
| CCAATCCATCGGGAACCCGAGGG         | 0.8   | 4MMs [4:8:9:10] |           | chr6:-30449530  |

### Guide #2 (9678)

Quality score: **87**

Guide sequence: GGAGGGCAGCCGTGCATCA**CGG**

On-target locus: chr7:-129409743

Number of off-target sites: 83 (22 are in genes)

| sequence                       | score | mismatches      | UCSC gene    | locus            |
|--------------------------------|-------|-----------------|--------------|------------------|
| GGAGGGCAGCCGTGCATCCAGG         | 2.4   | 2MMs [9:20]     |              | chr20:+43221228  |
| CCAGGGCAGTCCGTGCATCAGAG        | 0.8   | 4MMs [1:2:9:10] |              | chr17:+48274952  |
| <u>GGAGGCCTCGCCGTGCGTCACAG</u> | 0.7   | 3MMs [6:8:17]   | NM_001040285 | chr16:-50187013  |
| GGCTTGACAGCCCTGCATCAAAG        | 0.6   | 4MMs [3:4:5:13] |              | chr17:+6113729   |
| GGAGGGCAGTCCCTGCATCAGGG        | 0.5   | 3MMs [9:10:13]  |              | chr11:-134043507 |

**Fig.S9 TKI resistance is associated with a shift in ME% of K562 cells.**

**A CONTROL**

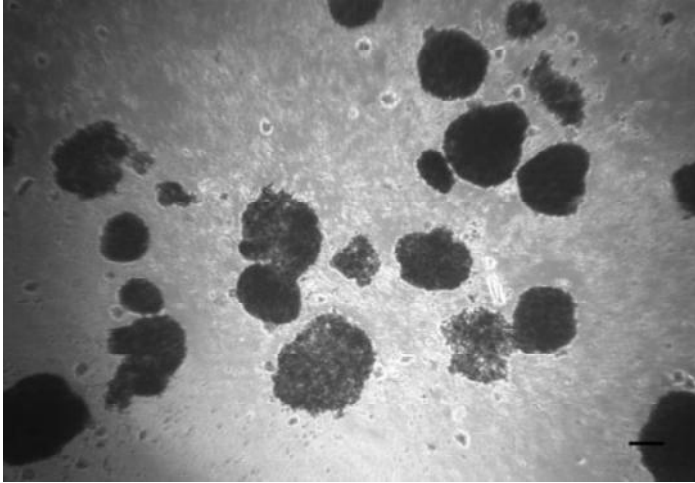

**B IM-0.75  $\mu$ M**

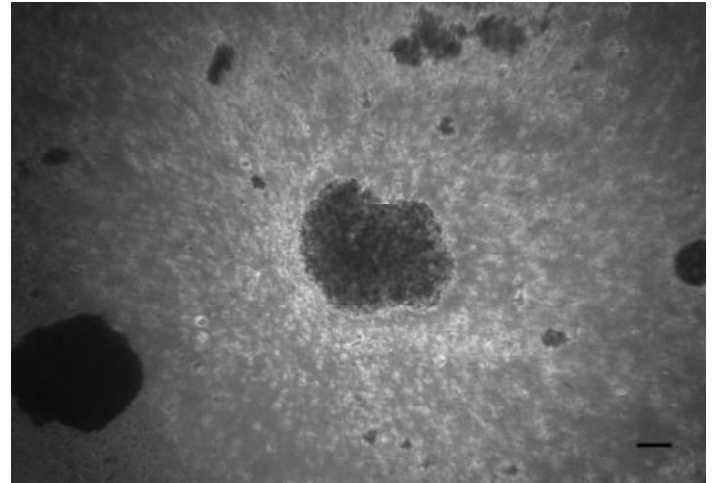

**C CONTROL**

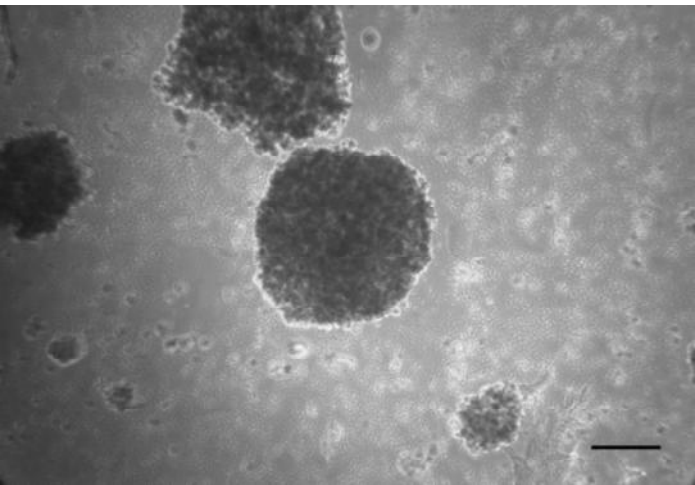

**D IM-0.75  $\mu$ M**

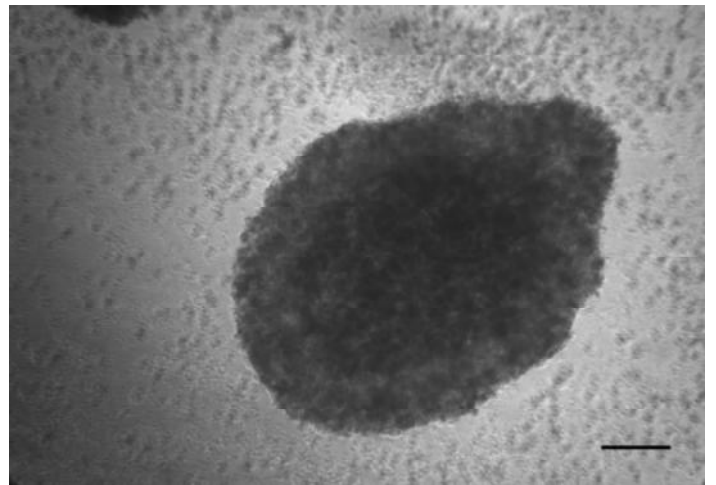

**E**

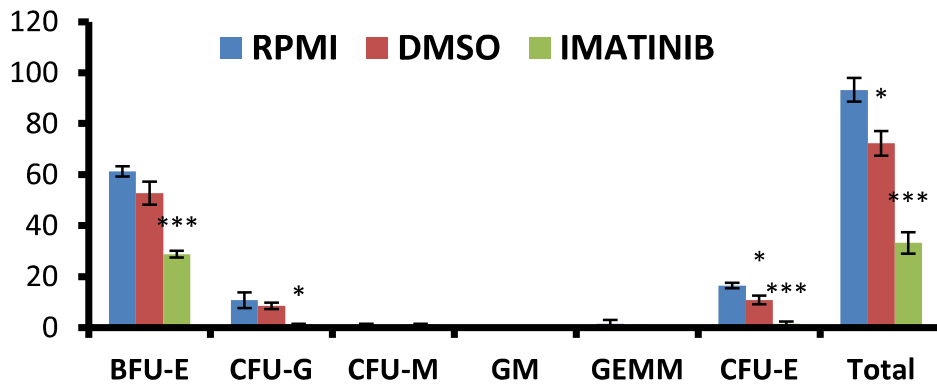

**F**

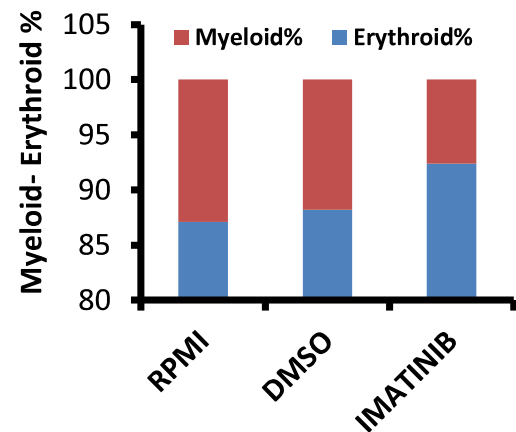



**Fig. S10 Proliferation potential of  $\Delta 182$  cells.**

**A** **B** **C**

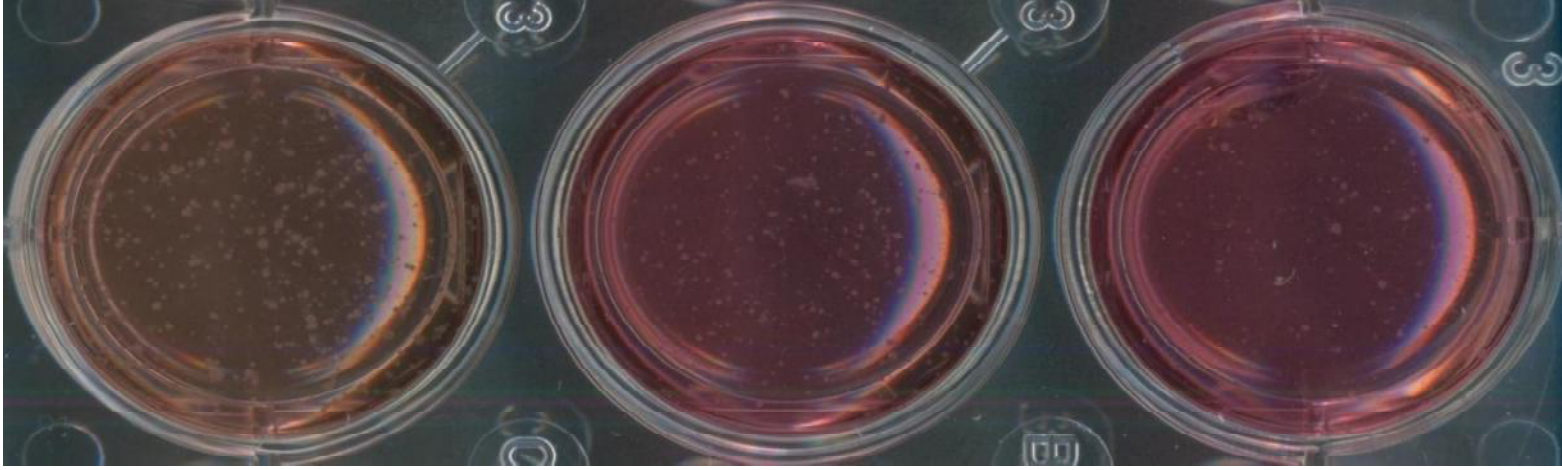

**D** **E** **F**

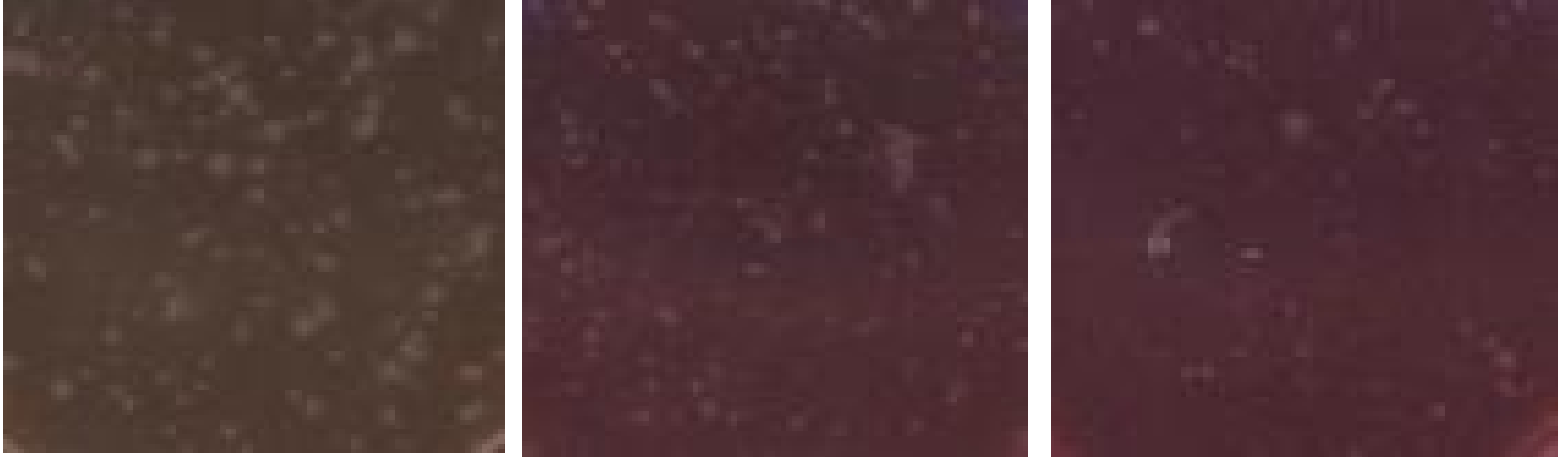

**G**

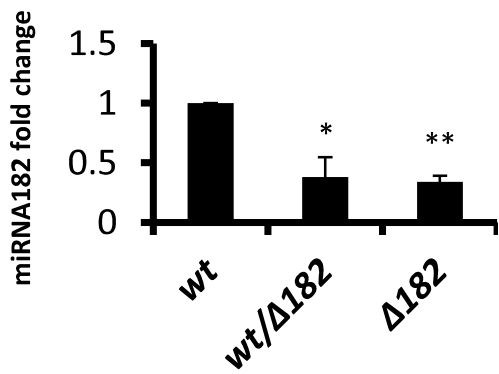

**H**

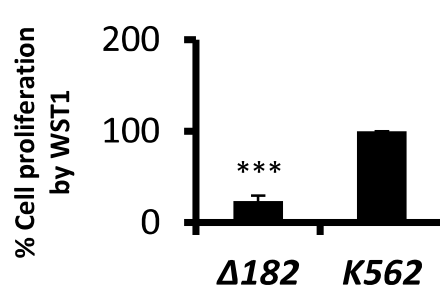

**I**

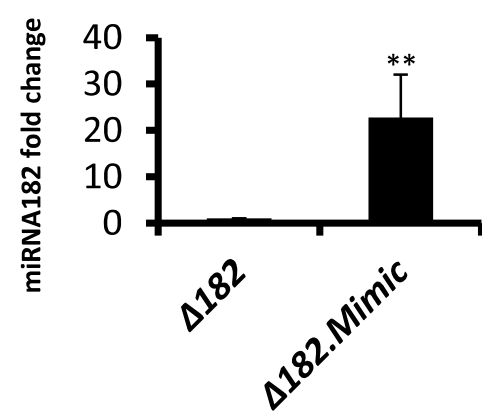

Supplement: cddis2016471x1.pdf [file cddis2016471x1.pdf]
